# Supplementary material for: Seroprevalence of Anti-SARS-Cov-2 Antibodies among Patients Visiting Hospital-Based Sentinel Sites in the Rift Valley Region, Kenya
Source: Preprints.org preprint supplement (doi:10.20944/preprints202403.0923.v1), 2024-03-15
Supplement: Supplementary file 1 [file supplementary]

Supplementary Table 1: Age-Specific COVID-19 seroprevalence in the Rift Valley, Kenya, January - December 2022.

| Age Groups | Negative | Positive | Prevalence (%) |
| --- | --- | --- | --- |
| 0-18 (n=67) | 1 | 66 | 98.5 |
| 19-30 (n=127) | 1 | 126 | 99.2 |
| 31-40 (n=99) | 2 | 97 | 98 |
| 41-50 (n=96) | 3 | 93 | 97 |
| 51-60 (n=65) | 2 | 63 | 96.9 |
| >61 (n=103) | 3 | 100 | 97.1 |
| All | 12 | 545 | 97.8 |
